# Supplementary material
Source: ML conference proceedings conference paper supplement (https://openaccess.thecvf.com/content/ICCV2023/html/Xu_DeepChange_A_Long-Term_ICCV_2023_paper.html)
Supplement: Supplementary file 1 [file Xu_DeepChange_A_Long-Term_ICCV_2023_supplemental.pdf]

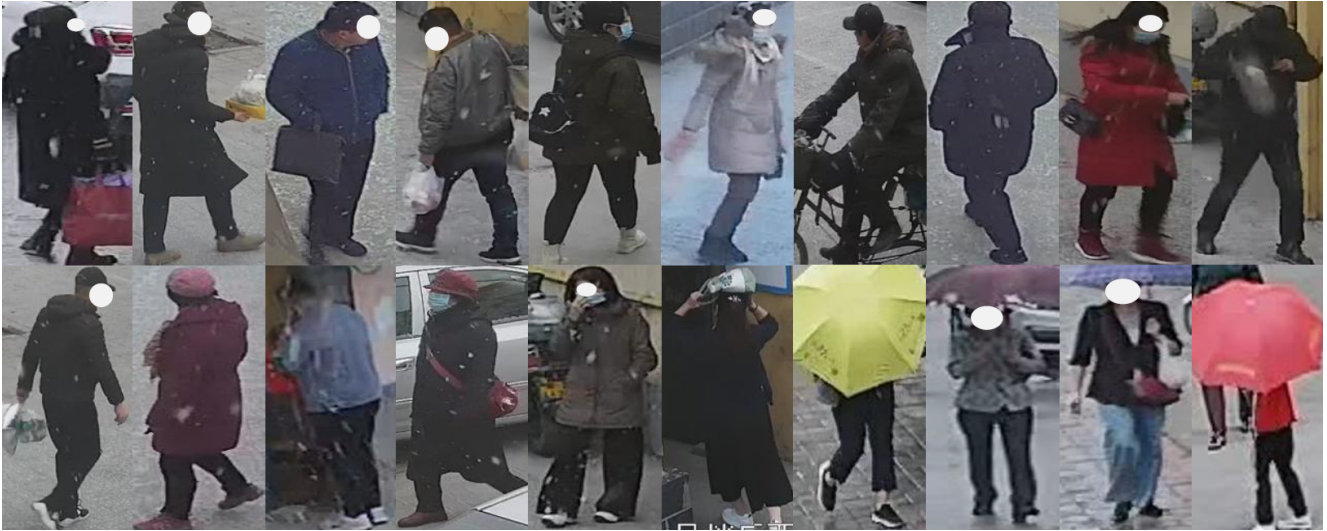

Figure 8. Samples collected in snow (bbox#1-#15) and rain (bbox#16-#20) weather from DeepChange. Best viewed in color.

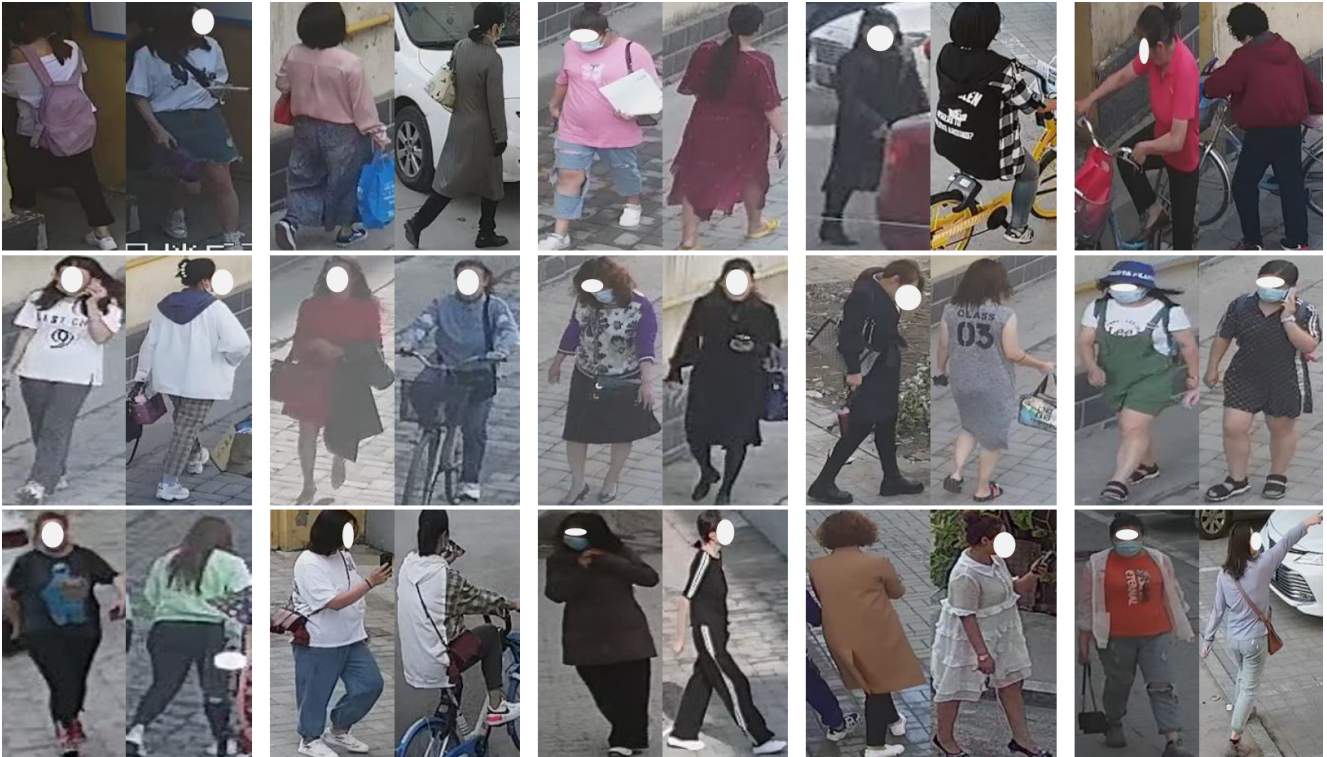

Figure 9. Sample pairs of specific persons with simultaneous clothes and hair style changes in the DeepChange dataset. For each identity, only two different cases are selected randomly. Best viewed in color.





**Supplementary figures** We provide more example images to further demonstrate the diversity of this dataset in person’s appearance.

Figure 8 shows more samples with snow and rain, where we can see that snow and rain can cause noticeable appearance changes on both clothes and background.

Figure 9 provides other random cases with simultaneous clothes and hair style changes.

Figure 10 demonstrates multiple bounding boxes of an identity randomly selected from our DeepChange dataset, where we can observe dramatic appearance changes across weathers, seasons, *etc.*
